# Supplementary material for: Inhibitors of the Oncogenic PA2G4-MYCN Protein-Protein Interface
Source: MDPI journal article supplement (doi:10.3390/cancers15061822), 2023-03-17
Supplement: s1 [file s1]

A

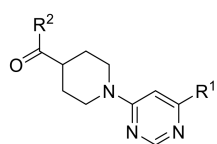

| Compound ID<br>Gen 1 | R <sup>1</sup> | R <sup>2</sup> | BE(2)C<br>(μM) | Kelly<br>(μM) | MRC5<br>(μM) | WI36<br>(μM) | Therapeutic<br>window |
|----------------------|----------------|----------------|----------------|---------------|--------------|--------------|-----------------------|
| SVI-3556             |                |                | 100.00         | 35.00         | 100.00       | 100.00       | 1.48                  |
| SVI-3557             |                |                | 26.00          | 30.00         | 100.00       | 80.00        | 3.21                  |
| SVI-3558             |                |                | 50.00          | 100.00        | 100.00       | 100.00       | 1.3                   |
| SVI-3559             |                |                | 100.00         | 100.00        | 100.00       | 100.00       | 1                     |
| SVI-3560             |                |                | 100.00         | 100.00        | 100.00       | 100.00       | 1                     |
| SVI-3561             |                |                | 100.00         | 100.00        | 100.00       | 100.00       | 1                     |
| SVI-3562             |                |                | 100.00         | 100.00        | 100.00       | 100.00       | 1                     |
| SVI-3563             |                |                | 100.00         | 100.00        | 100.00       | 100.00       | 1                     |
| SVI-3564             |                |                | 100.00         | 100.00        | 100.00       | 100.00       | 1                     |
| SVI-3565             |                |                | 100.00         | 100.00        | 100.00       | 100.00       | 1                     |
| SVI-3566             |                |                | 100.00         | 100.00        | 100.00       | 100.00       | 1                     |
| SVI-3568             |                |                | 28.84          | 32.77         | 38.65        | 48.02        | 1.4                   |
| SVI-3569             |                |                | 50.00          | 75.00         | 100.00       | 100.00       | 1.6                   |

**B**

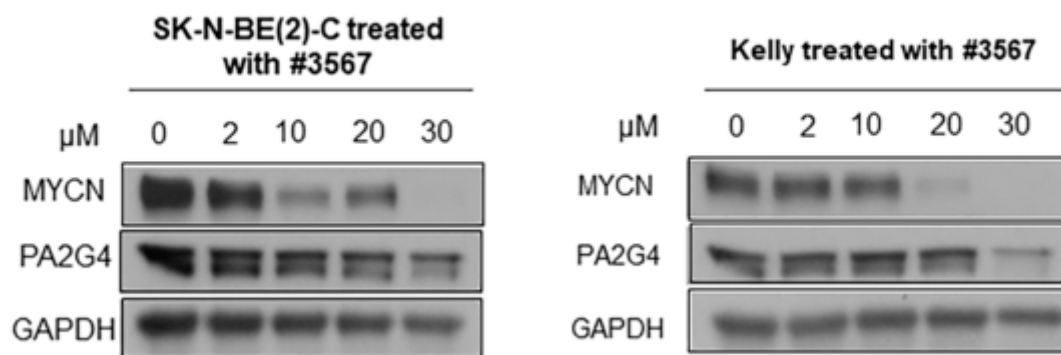

C

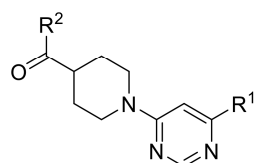

| Compound ID<br>Gen 2 | R <sup>1</sup> | R <sup>2</sup> | BE(2)C<br>(μM) | Kelly<br>(μM) | MRC5<br>(μM) | WI36<br>(μM) | Therapeutic<br>window |
|----------------------|----------------|----------------|----------------|---------------|--------------|--------------|-----------------------|
| SVI-5307             |                |                | 100.00         | 100.00        | 100.00       | 100.00       | 1                     |
| SVI-5308             |                |                | 40.00          | 37.00         | 100.00       | 100.00       | 2.59                  |
| SVI-5309             |                |                | 100.00         | 100.00        | 100.00       | 100.00       | 1                     |
| SVI-5310             |                |                | 100.00         | 100.00        | 100.00       | 100.00       | 1                     |
| SVI-5311             |                |                | 40.00          | 32.00         | 100.00       | 100.00       | 2.7                   |
| SVI-5312             |                |                | 25.00          | 28.00         | 100.00       | 100.00       | 3.77                  |
| SVI-5313             |                |                | 32.00          | 39.00         | 100.00       | 100.00       | 1.9                   |
| SVI-5314             |                |                | 35.00          | 80.00         | 100.00       | 100.00       | 1.734                 |
| SVI-5315             |                |                | 100.00         | 100.00        | 100.00       | 100.00       | 1                     |
| SVI-5316             |                |                | 60.00          | 60.00         | 75.00        | 75.00        | 1.25                  |
| SVI-5317             |                |                | 55.00          | 30.00         | 45.00        | 58.00        | 1.21                  |
| SVI-5318             |                |                | 100.00         | 70.00         | 100.00       | 100.00       | 1.17                  |
| SVI-5319             |                |                | 100.00         | 100.00        | 100.00       | 100.00       | 1                     |

|          |                                                                                     |                                                                                     |        |        |        |        |       |
|----------|-------------------------------------------------------------------------------------|-------------------------------------------------------------------------------------|--------|--------|--------|--------|-------|
| SVI-5320 | 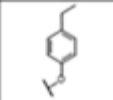   |    | 100.00 | 100.00 | 100.00 | 100.00 | 1     |
| SVI-5321 |    |    | 70.00  | 60.00  | 100.00 | 100.00 | 1.54  |
| SVI-5322 |    |    | 100.00 | 100.00 | 100.00 | 100.00 | 1     |
| SVI-5323 |    |    | 4.00   | 7.00   | 10.00  | 30.00  | 2.2   |
| SVI-5324 |    |    | 32.00  | 52.00  | 100.00 | 100.00 | 2.4   |
| SVI-5325 |    |    | 65.00  | 60.00  | 100.00 | 100.00 | 1.6   |
| SVI-5326 |    |    | 53.00  | 40.00  | 100.00 | 100.00 | 2.2   |
| SVI-5327 |   |   | 100.00 | 100.00 | 100.00 | 100.00 | 1     |
| SVI-5328 |  |  | 100.00 | 70.00  | 100.00 | 100.00 | 1.176 |
| SVI-5329 |  |  | 25.00  | 12.00  | 22.00  | 58.00  | 2.16  |
| SVI-5330 |  |  | 55.00  | 65.00  | 100.00 | 100.00 | 1.67  |
| SVI-5331 |  |  | 55.00  | 30.00  | 75.00  | 100.00 | 2.1   |
| SVI-5332 |  |  | 30.00  | 35.00  | 100.00 | 100.00 | 3.07  |

D

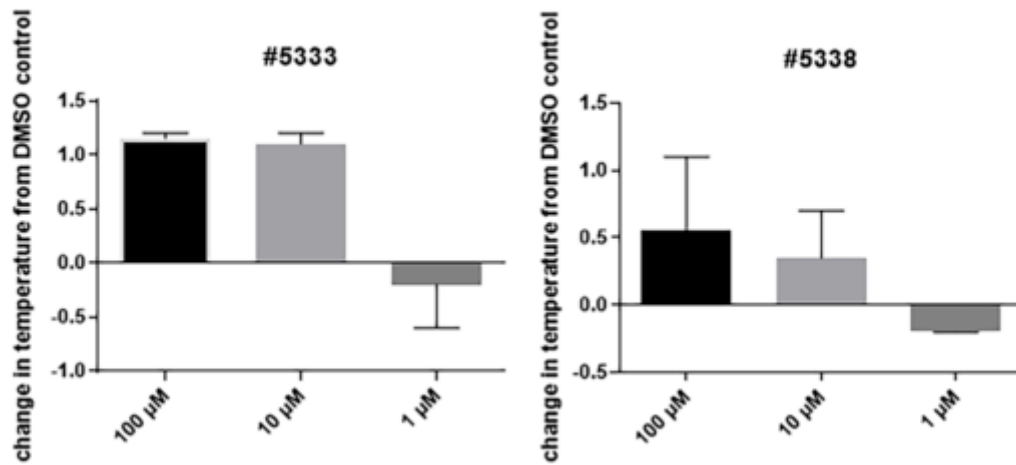

**Figure S1.** (A) Structure to activity relationships (SAR) of WS6 analogues by comparisons of IC<sub>50</sub> concentrations for treated neuroblastoma cells (SK-N-BE(2)-C and Kelly cells) and normal fibroblasts (MRC5 and WI36 cells) for R1 and R2 substituents of WS6. (B) Western blot showing a concentration-dependent decrease in MYCN and PA2G4 protein expression following #3567 treatment of SK-N-BE(2)-C and Kelly neuroblastoma cells. (C) SAR of #3567 analogues with R1 and R2 substituents by comparisons of IC<sub>50</sub> concentrations for treated neuroblastoma and normal fibroblast cells. (D) Differential Scanning fluorimetry (DSF) of #5333 and #5338 changing the melting temperature of the PA2G4 protein, relative to DMSO control.

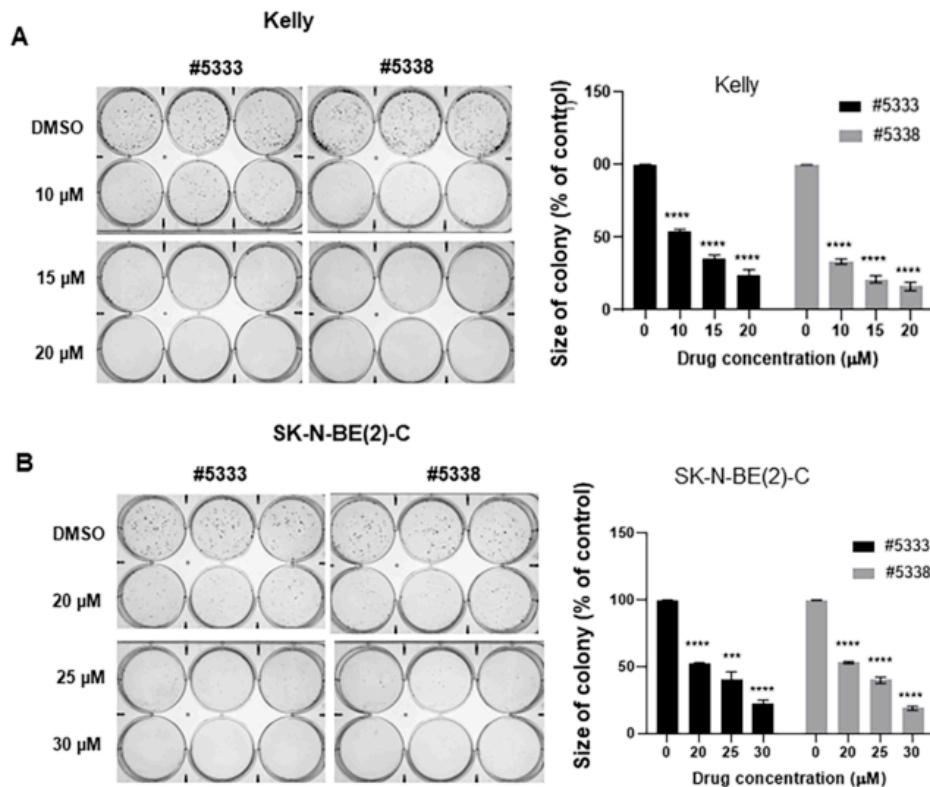

**Figure S2.** Representative colony formation plate images and the size of the colonies of (A) Kelly and (B) SK-N-BE(2)-C neuroblastoma cells treated with #5333 or #5338 for 2 weeks at a range of concentrations. "\*\*\*\*" is  $p$  value < 0.001 and "\*\*\*\*\*" is  $p$  value < 0.0001 when compared with no treatment control.

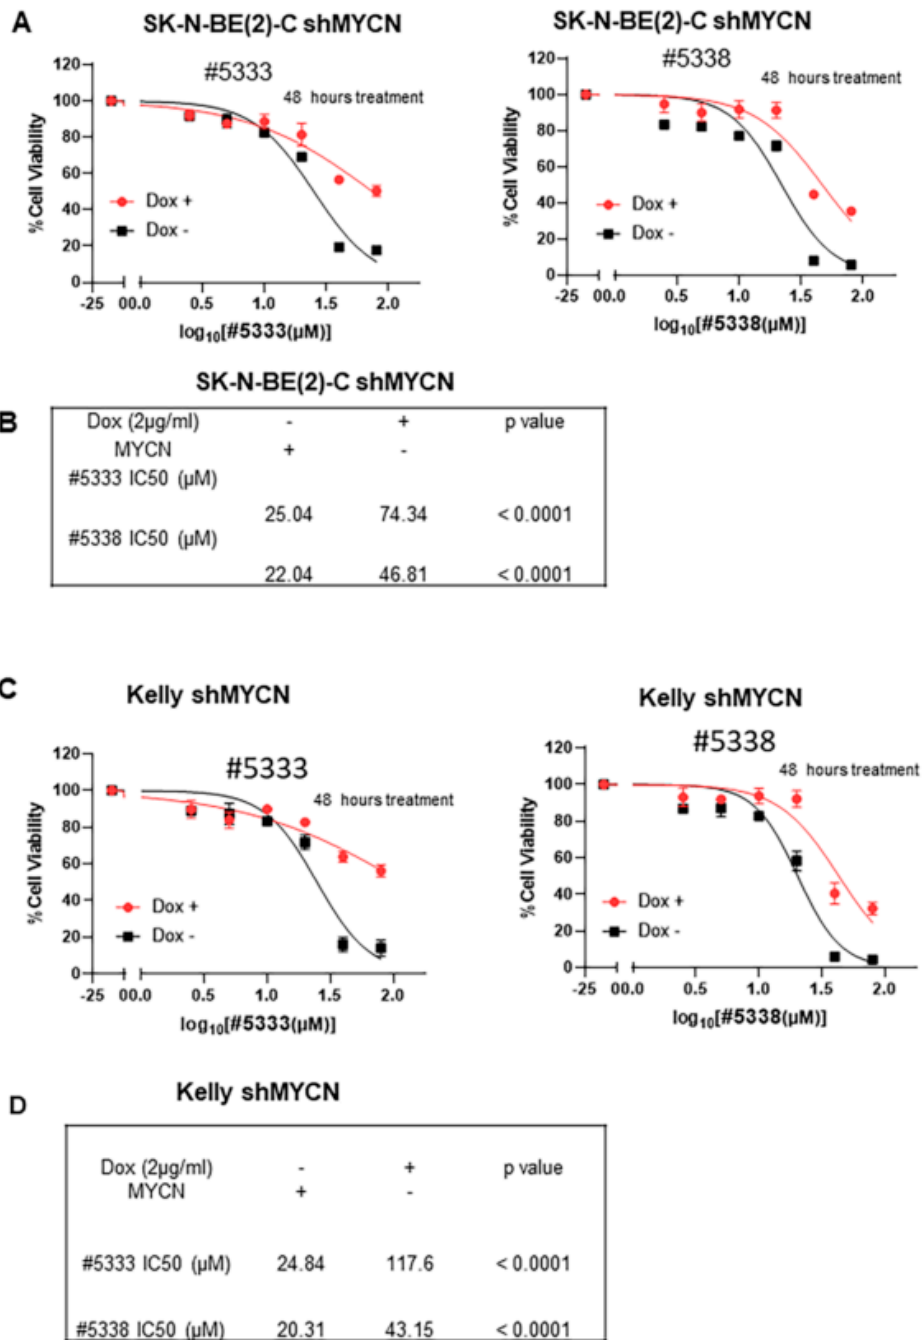

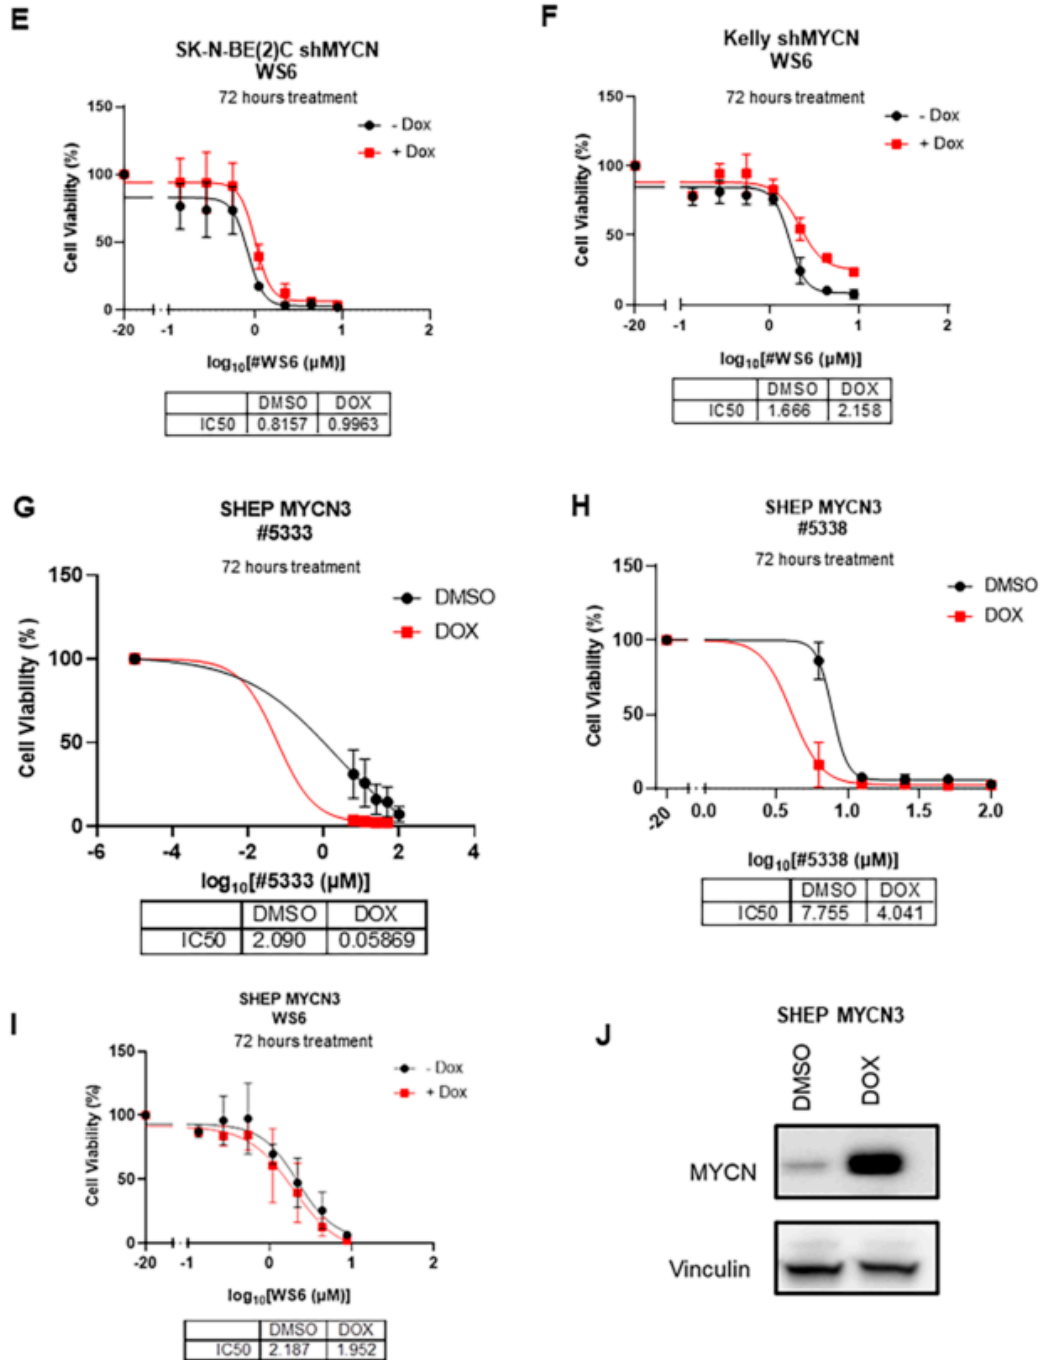

**Figure S3.** (A) Alamar blue assays comparing cell viability of SK-N-BE(2)-C shMYCN cells with Dox-inducible inhibition of MYCN expression using stable shMYCN, followed by 48 hours either #5333 or #5338 treatment. (B) IC50 comparisons, with and without Dox, of SK-N-BE(2)-C shMYCN treated with either #5333 or #5338 for 48 hours. (C) Alamar blue assays comparing cell viability of Kelly shMYCN cells with Dox-inducible inhibition of MYCN expression using stable shMYCN, followed by 48 hours of either #5333 and or #5338 treatment. (D) IC50 of comparisons, with and without Dox, of #5333 and #5338 treated SK-N-BE(2)-C shMYCN cells for 48 hours. (E,F) Alamar blue assays comparing cell viability of BE(2)-C shMYCN and Kelly shMYCN cells with Dox-inducible inhibition of MYCN expression, followed by 72 hours of WS6 treatment. (G–I) IC50 of comparisons, with and without Dox, of #5333, #5338 or WS6 treated SHEP MYCN3 cells for 72 hours. (J) Western blot measuring MYCN expression in Dox-inducible SHEP MYCN3 cells treated with DMSO or 2 μg/ml of Dox for 96 hours.

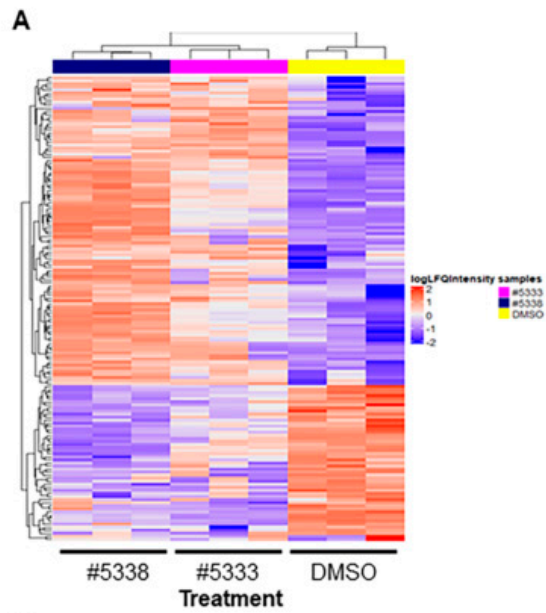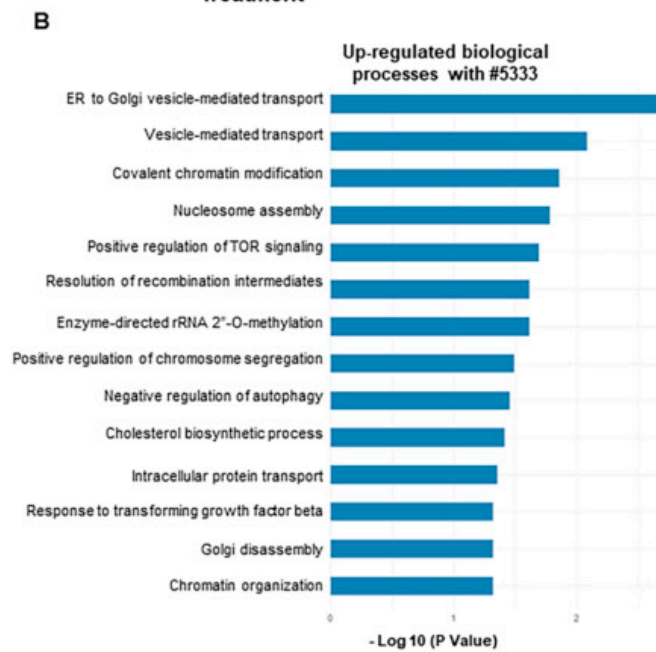



C

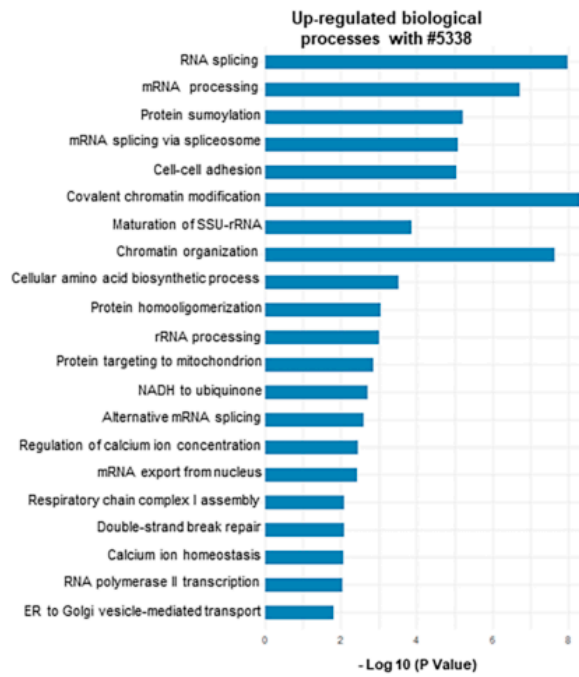

D

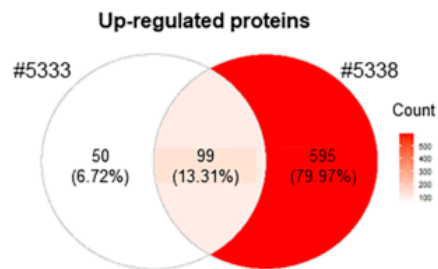

E

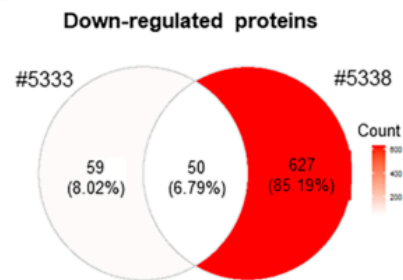

**F**

|                | Name    | Description                                    | Fold change |              | P values    |             |
|----------------|---------|------------------------------------------------|-------------|--------------|-------------|-------------|
|                |         |                                                | #5333       | #5338        | #5333       | #5338       |
| Down-regulated | CLNS1A  | Chloride Nucleotide-Sensitive Channel 1A       | -2.08493    | -3.944930818 | 0.000247219 | 3.13E-06    |
|                | CKS2    | CDC28 Protein Kinase Regulatory Subunit 2      | -2.17347    | -3.386981249 | 0.000905252 | 4.75E-05    |
|                | GATA2   | GATA Binding Protein 2                         | -4.19887    | -5.540437872 | 0.005438024 | 0.00204185  |
|                | TTC4    | Tetratricopeptide Repeat Domain 4              | -2.69447    | -4.626752736 | 0.043778462 | 0.006359681 |
|                | POLR3A  | RNA Polymerase III Subunit A                   | -1.65405    | -1.893427262 | 0.025340276 | 0.008550249 |
|                | IGBP1   | Immunoglobulin Binding Protein 1               | -2.67586    | -2.281527432 | 0.016150433 | 0.034372337 |
|                | MLLT11  | MLLT11, Transcription Factor 7 Cofactor        | -2.20381    | -5.815890069 | 0.009560792 | 7.84E-05    |
|                | BCAP29  | B Cell Receptor Associated Protein 29          | 1.505247    | 2.751083636  | 0.000166691 | 2.67E-07    |
| Up-regulated   | ASNS    | Asparagine Synthetase (Glutamine-Hydrolyzing)  | 1.860899    | 2.329467173  | 5.31E-06    | 5.64E-07    |
|                | GOLGA5  | Golgin A5                                      | 1.55617     | 2.099433367  | 0.001599758 | 5.86E-05    |
|                | BAZ1B   | NA                                             | 3.116658    | 6.062866266  | 0.005504928 | 0.000367455 |
|                | CYP51A1 | Cytochrome P450 Family 51 Subfamily A Member 1 | 1.917199    | 1.504203751  | 0.000172959 | 0.003031716 |
|                | PTTG1P  | PTTG1 Interacting Protein                      | 6.364292    | 24.5900029   | 0.045955544 | 0.003760453 |
|                | STC2    | Stanniocalcin 2                                | 1.872544    | 1.666706414  | 0.001482229 | 0.004710286 |
|                | HMGCR   | NA                                             | 2.281527    | 3.340351678  | 0.035199837 | 0.006121218 |
|                | DNAJB12 | NA                                             | 2.675855    | 2.514026749  | 0.021226897 | 0.02754231  |
|                | NUDT2   | Nudix Hydrolase 2                              | 5.578975    | 4.823231311  | 0.022201847 | 0.03177869  |
|                |         |                                                |             |              |             |             |
|                |         |                                                |             |              |             |             |
|                |         |                                                |             |              |             |             |

**Figure S4.** (A) Heat map of the differentially expressed proteins in SK-N-BE(2)-C cells treated with 2 x the IC50 concentrations of #5333, #5338, and incubated for 72 hours, compared to DMSO. (B) and (C) Up-regulated GO biological processes -log10 p value bar plots for #5333 and #5338. (D) and (E) Venn diagrams of up-regulated and down-regulated proteins following treatment of SK-N-BE(2)-C cells by #5333 and #5338 for 72 hours, showing proportionate overlap. (F) Table showing proteins with the highest fold changes in expression following the treatment of SK-N-BE(2)-C cells with #5333 and #5338 which were also MYC target genes.

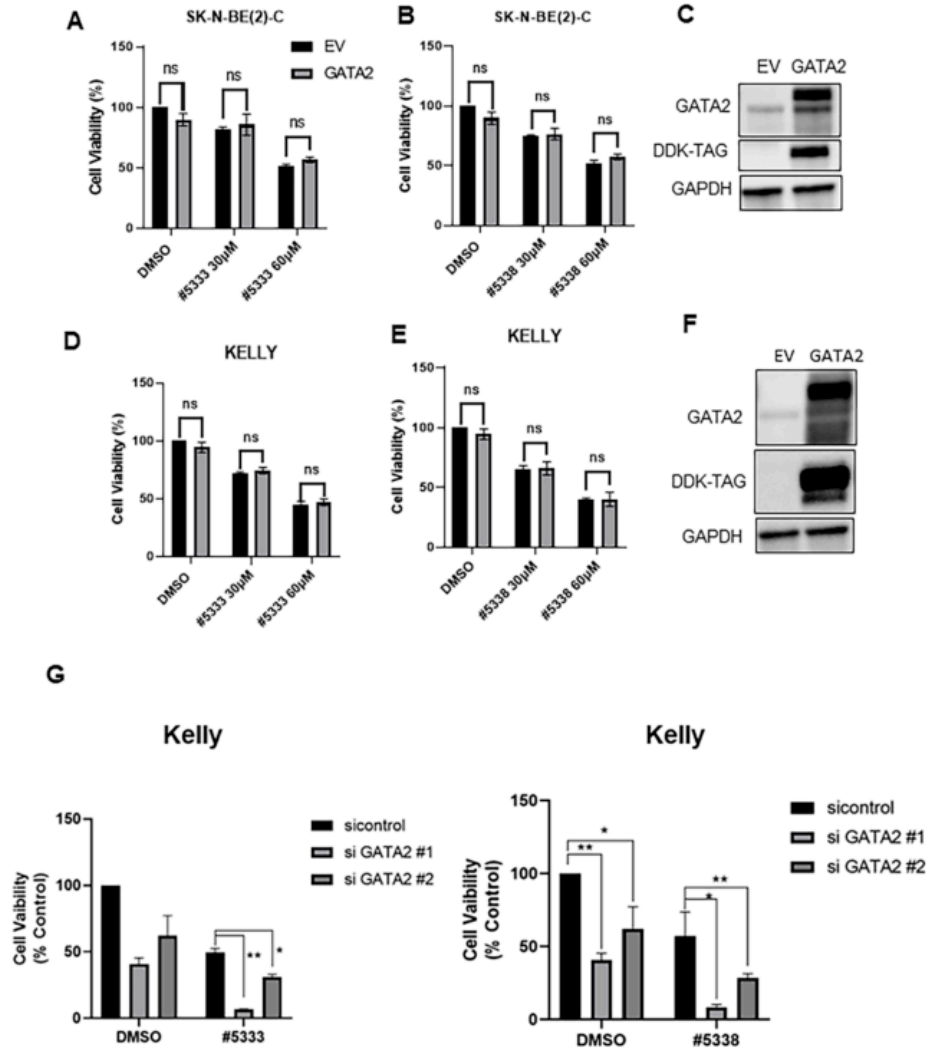

**Figure S5.** (A) and (B) Cell viability was measured by the Alamar blue assay in SK-N-BE(2)-C cells following overexpression of GATA2 plasmid DNA for 72 hours and treatment with #5333 or #5338 for 48 hours. (C) Confirmation of overexpression of GATA2 in SK-N-BE(2)-C cells detected by DDK-tag and GATA2 antibodies. (D) and (E) Cell viability was measured by the Alamar blue assay in Kelly cells following overexpression of GATA2 plasmid DNA for 72 hours and treatment with #5333 and #5338 for 48 hours. (F) Confirmation of overexpression of GATA2 in Kelly cells detected by DDK-tag and GATA2 antibodies. (G) Kelly cell viability was measured after transfected with siRNA control and two GATA2 siRNAs (siRNA#1 and #2) for 96 hours, and treated with #5333 (26.5 μM) or #5338 (23.3 μM) for 72 hours using Alamar Blue assay. “\*” is  $p$  value < 0.05, “\*\*” is  $p$  value < 0.01 when compared to DMSO treated control, ns: non-significant.
