# Supplementary figures and images for: Inhibitors of the Oncogenic PA2G4-MYCN Protein-Protein Interface
Source: MDPI journal article supplement (doi:10.3390/cancers15061822), 2023-03-17

Figure 2E

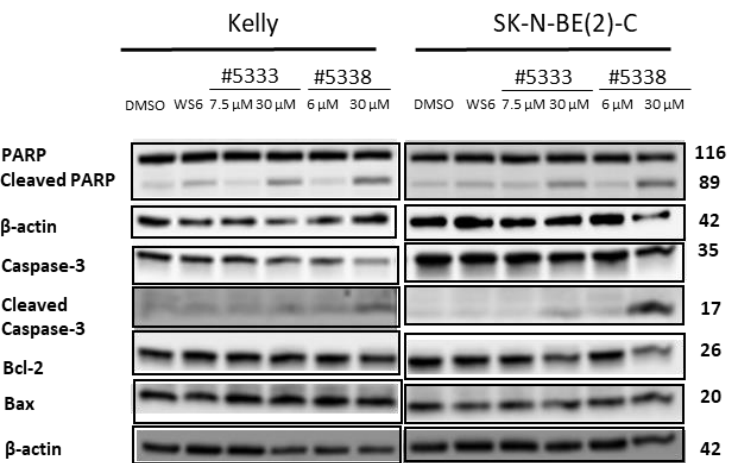

Repeat 1

Repeat 2

Repeat 3

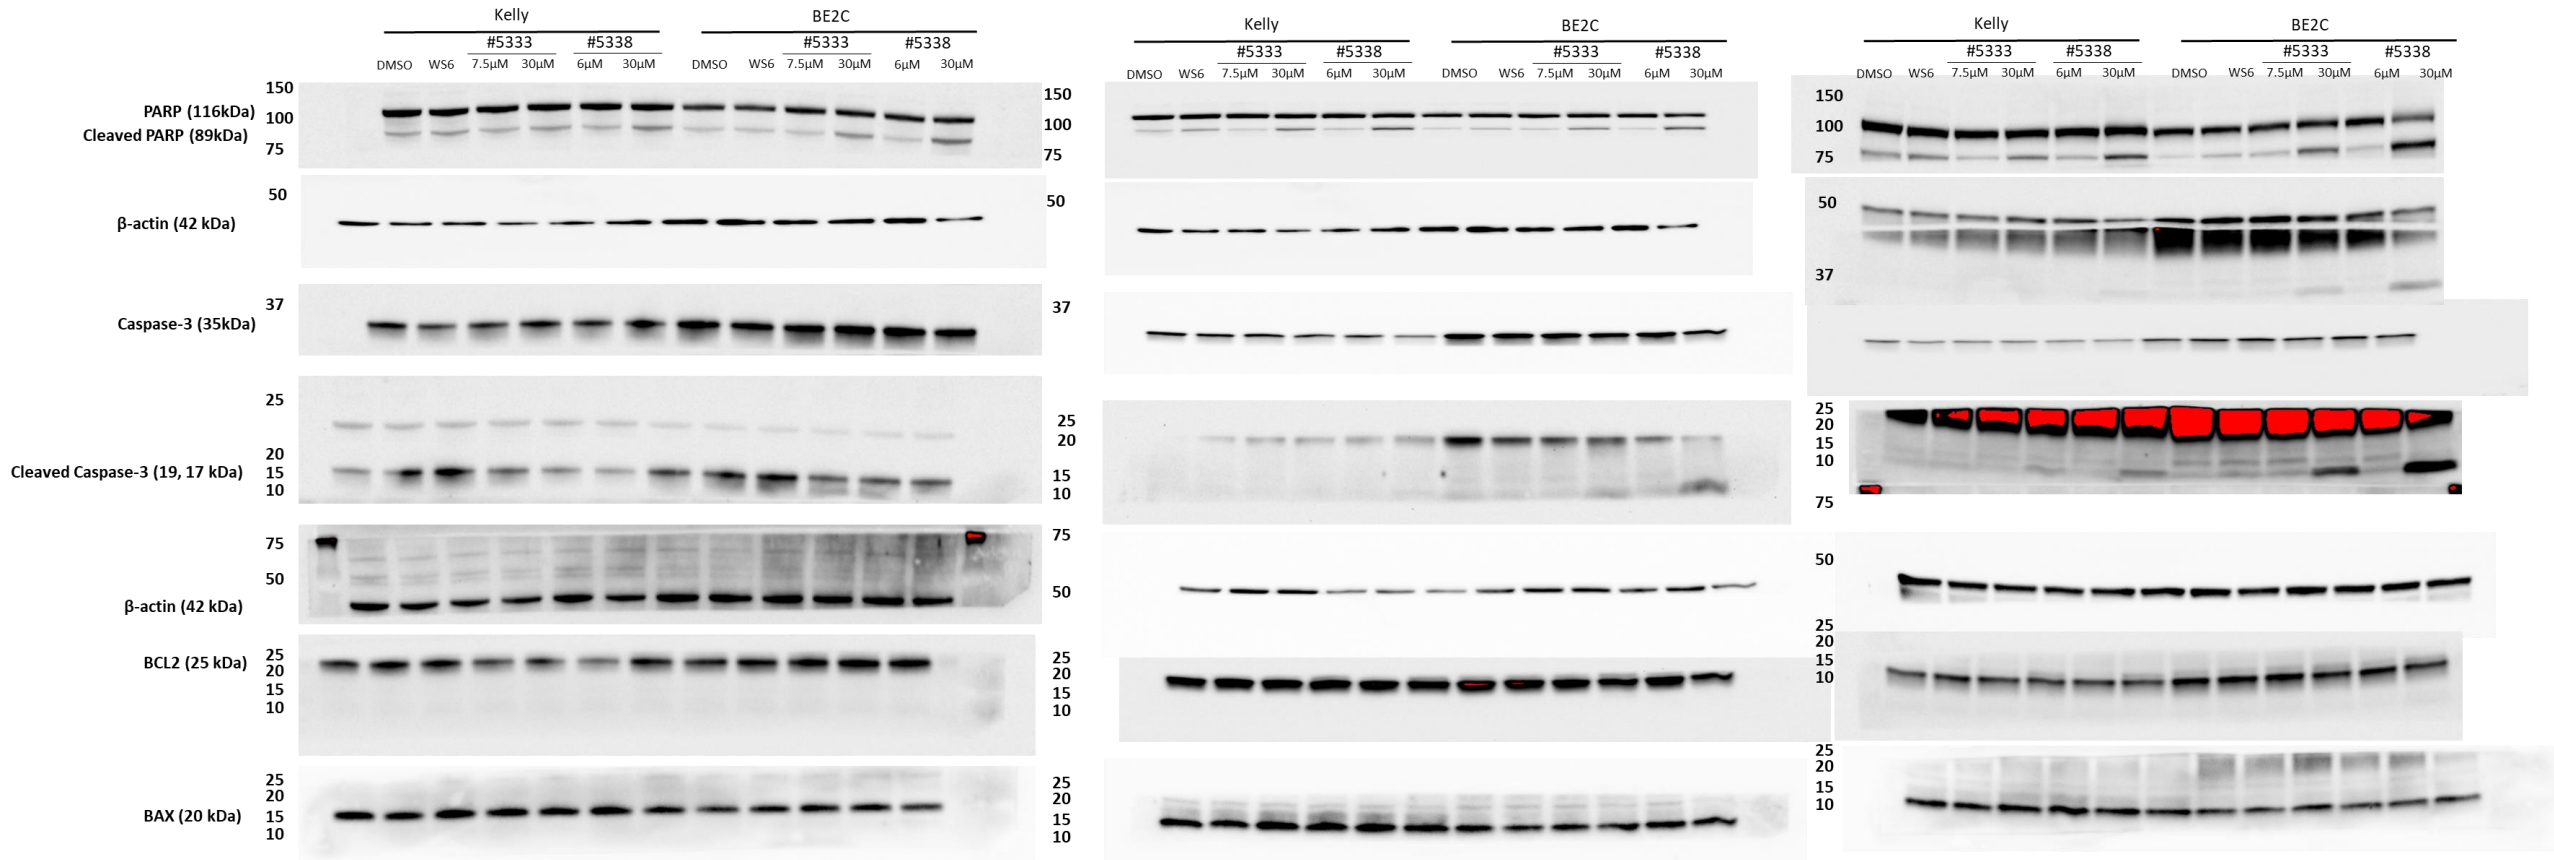

Figure 3 A

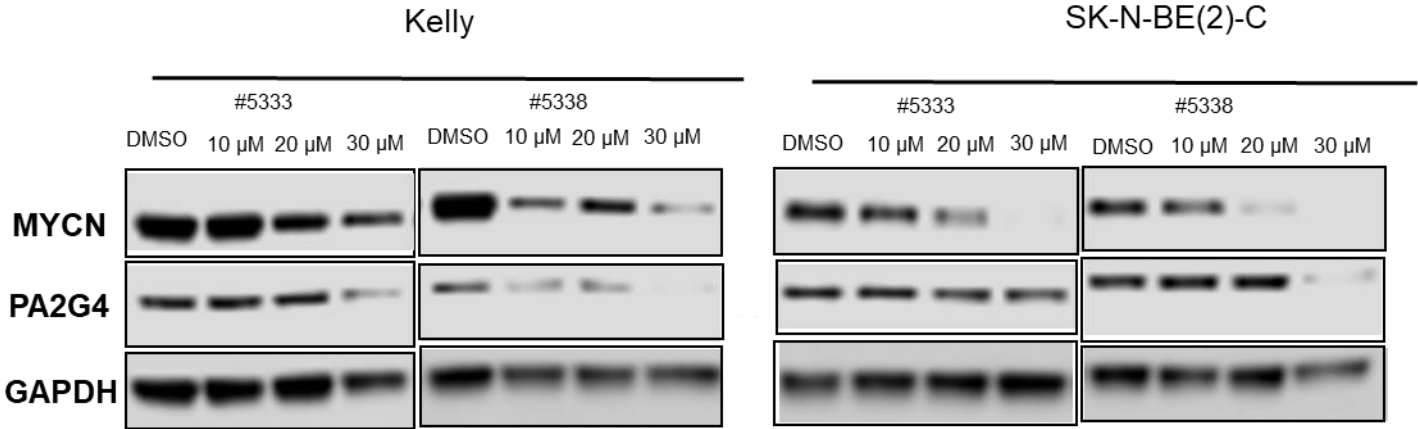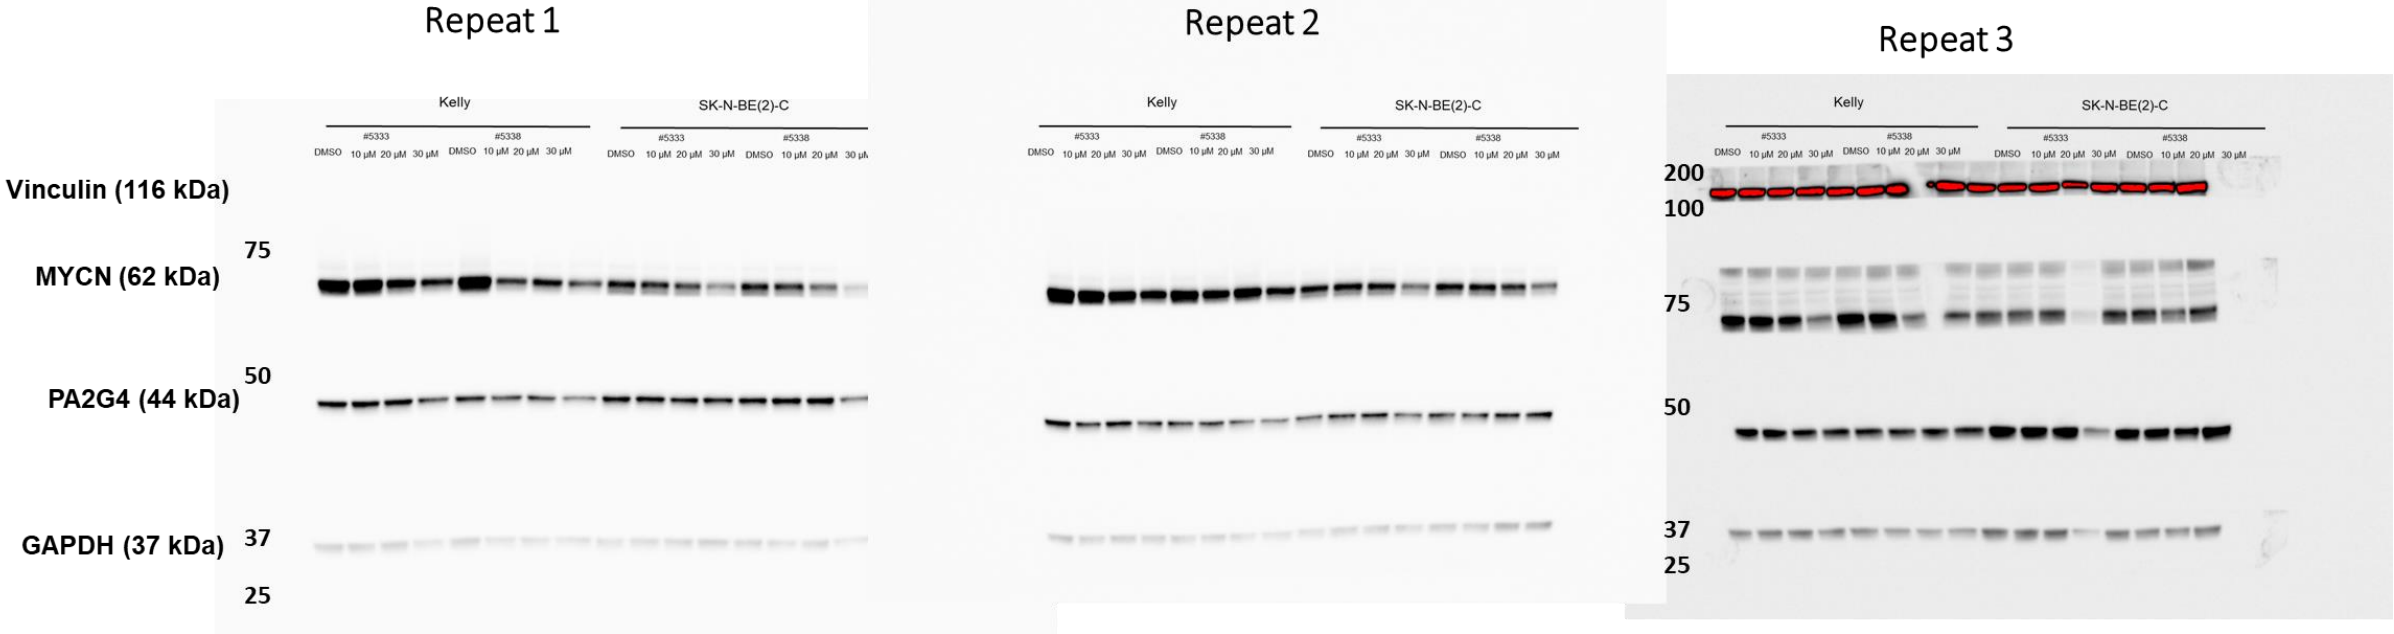

Figure 3 D & G

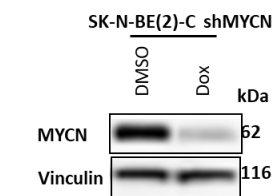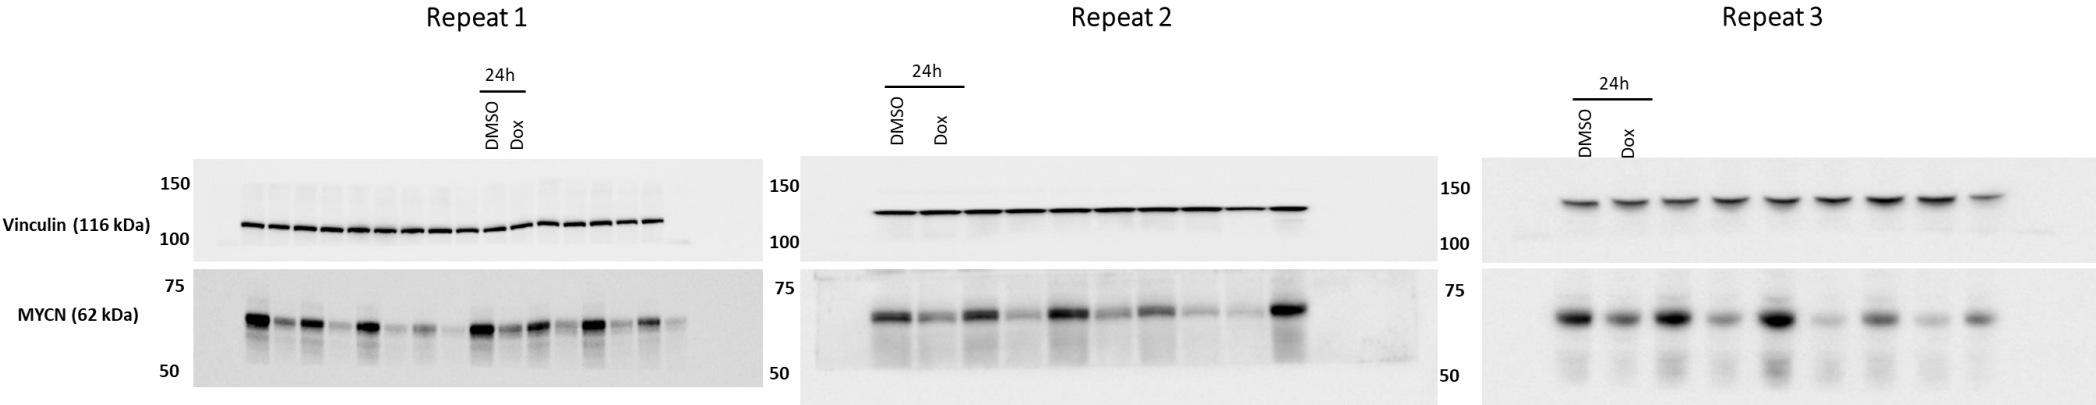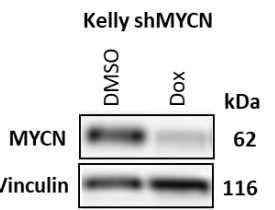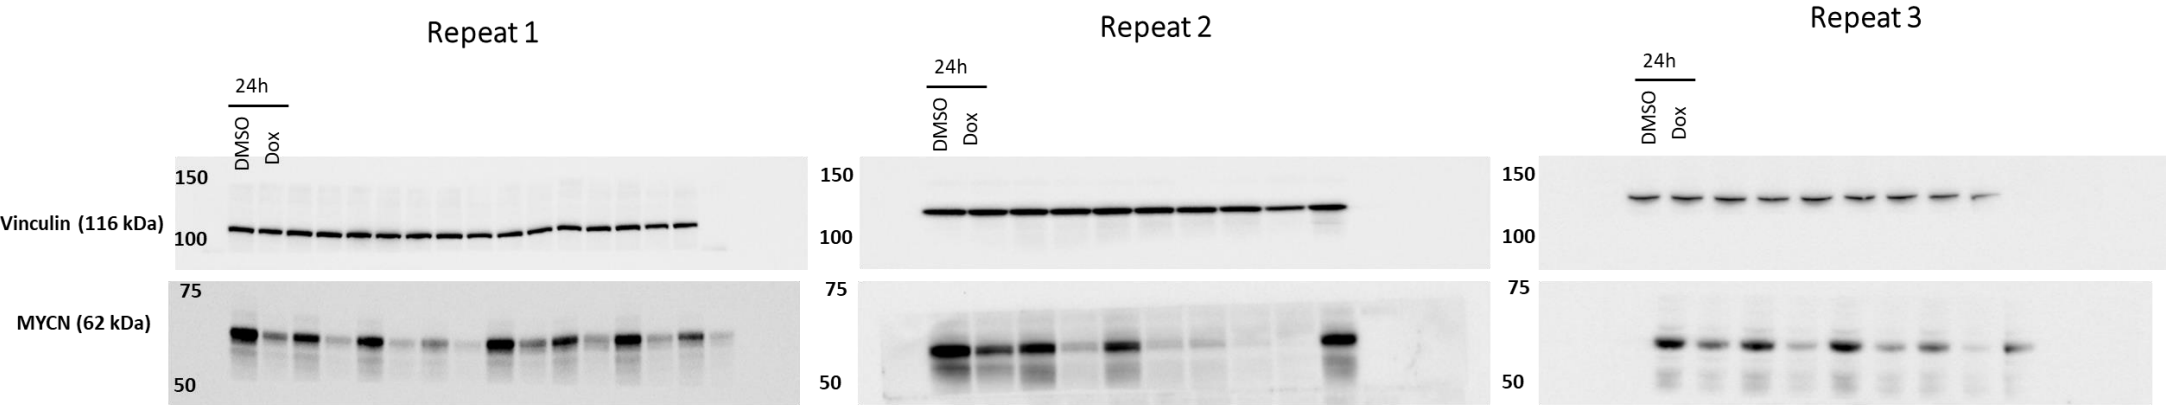

Figure 3H

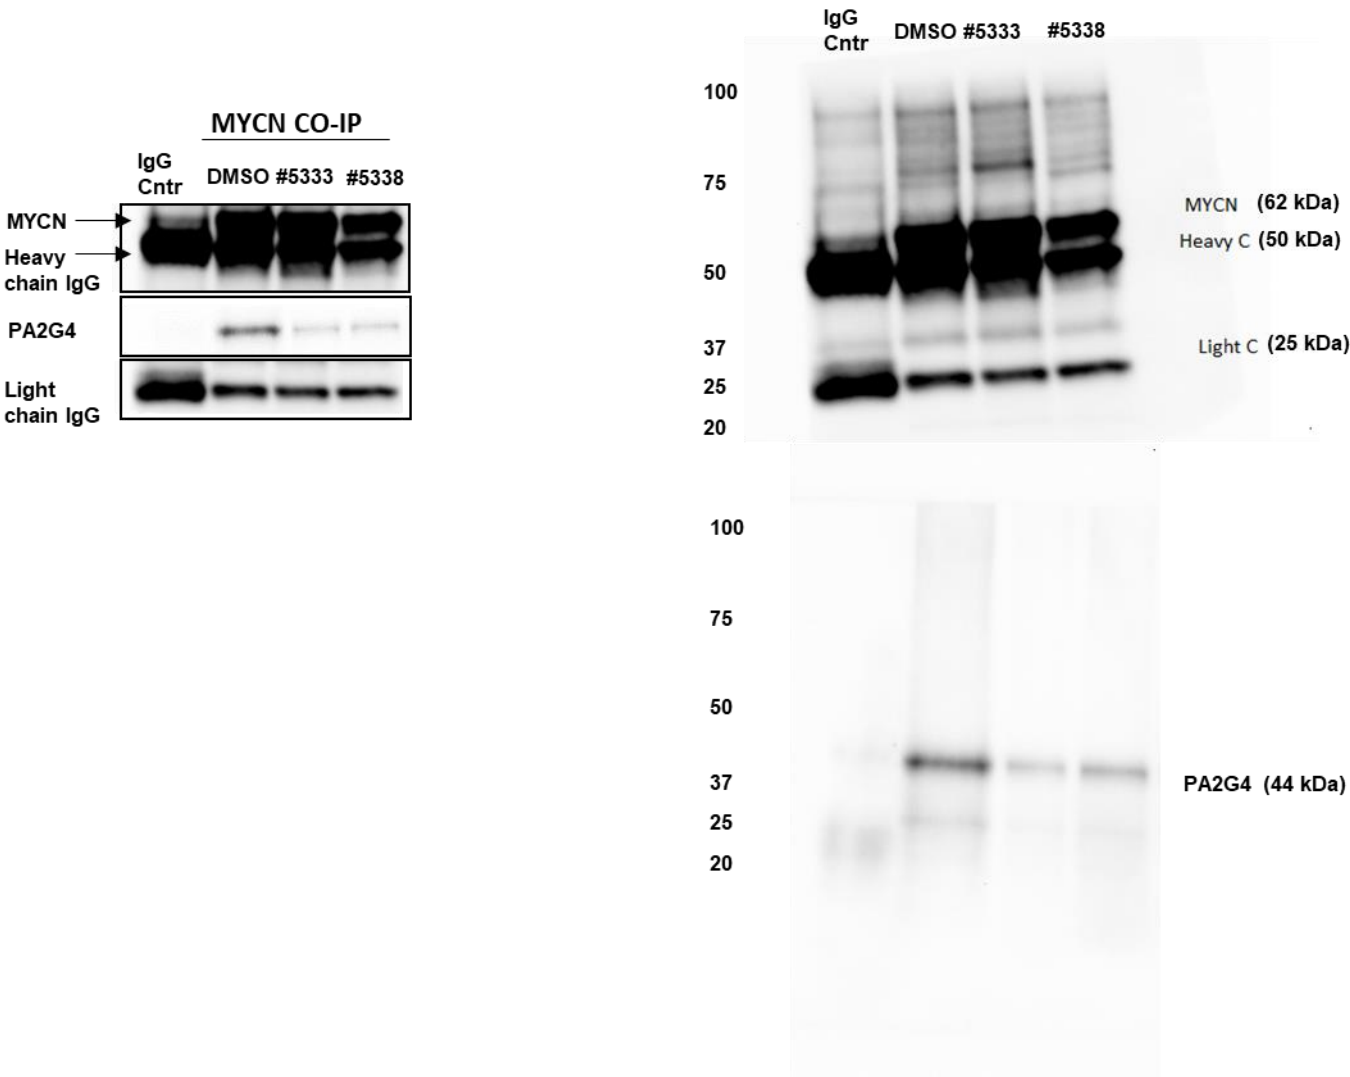

Figure 5A

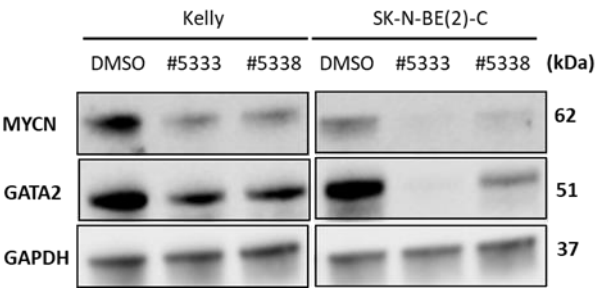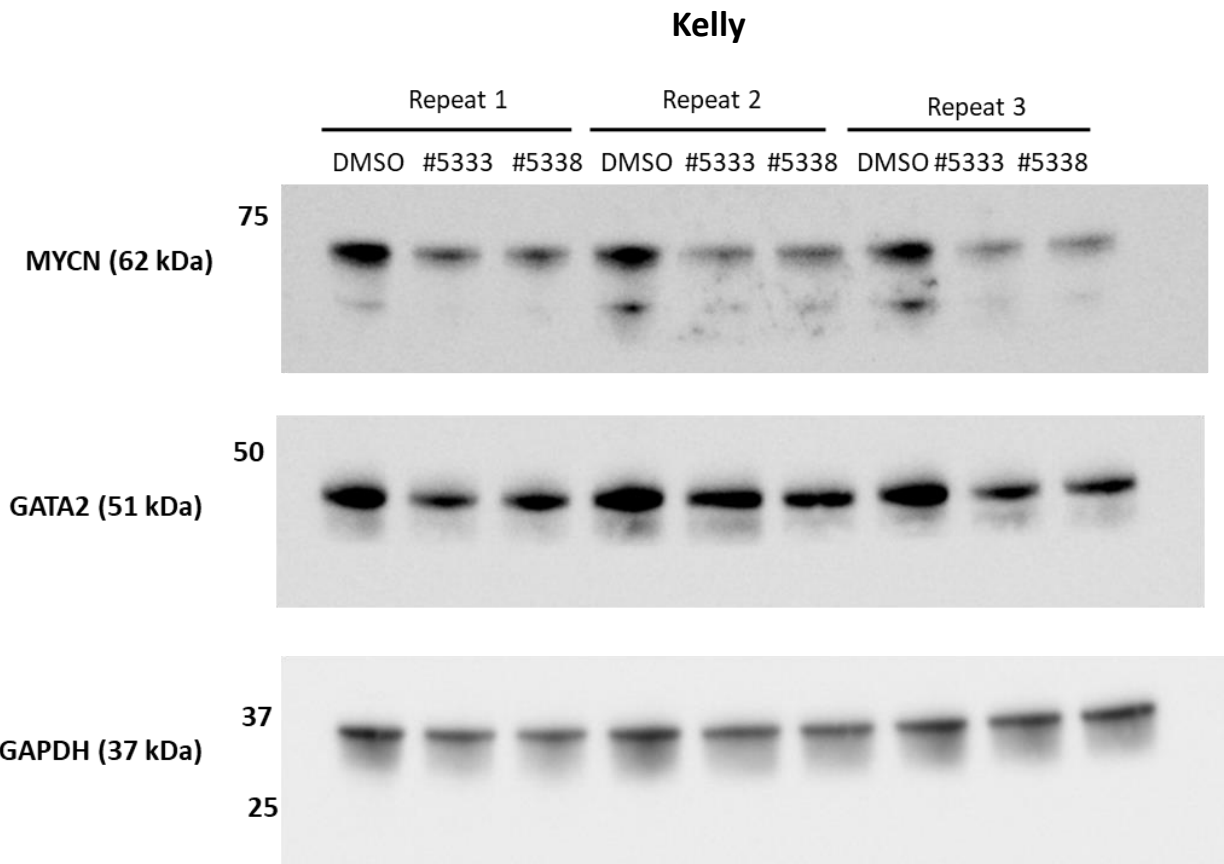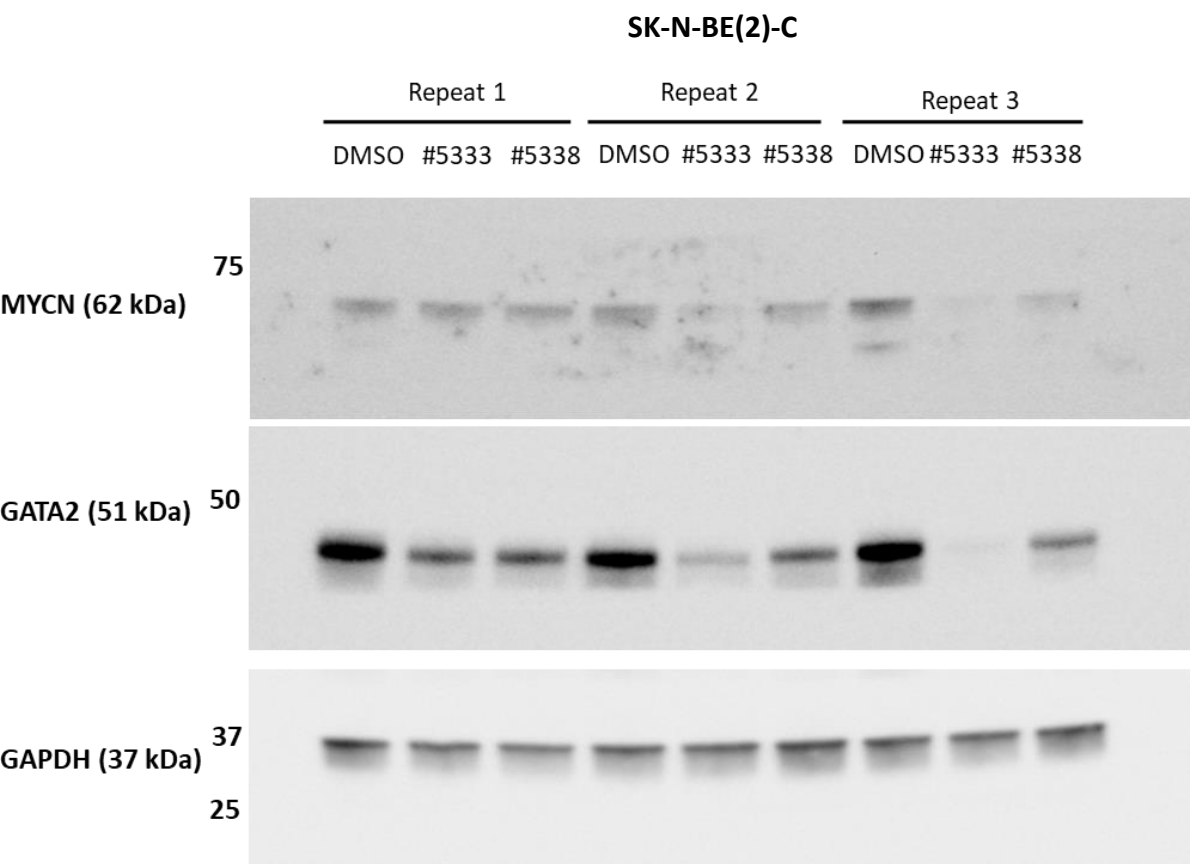

Figure 5C

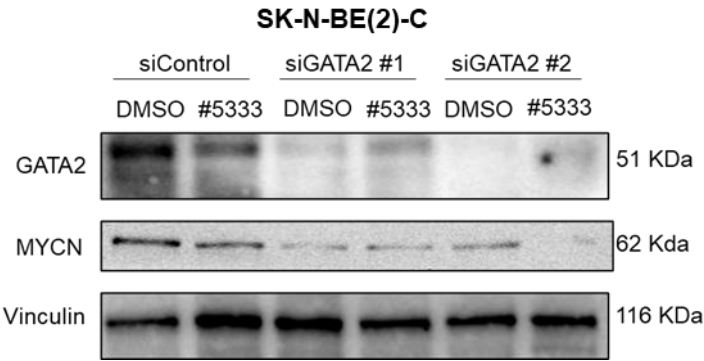

Repeat 1

Repeat 2

Repeat 3

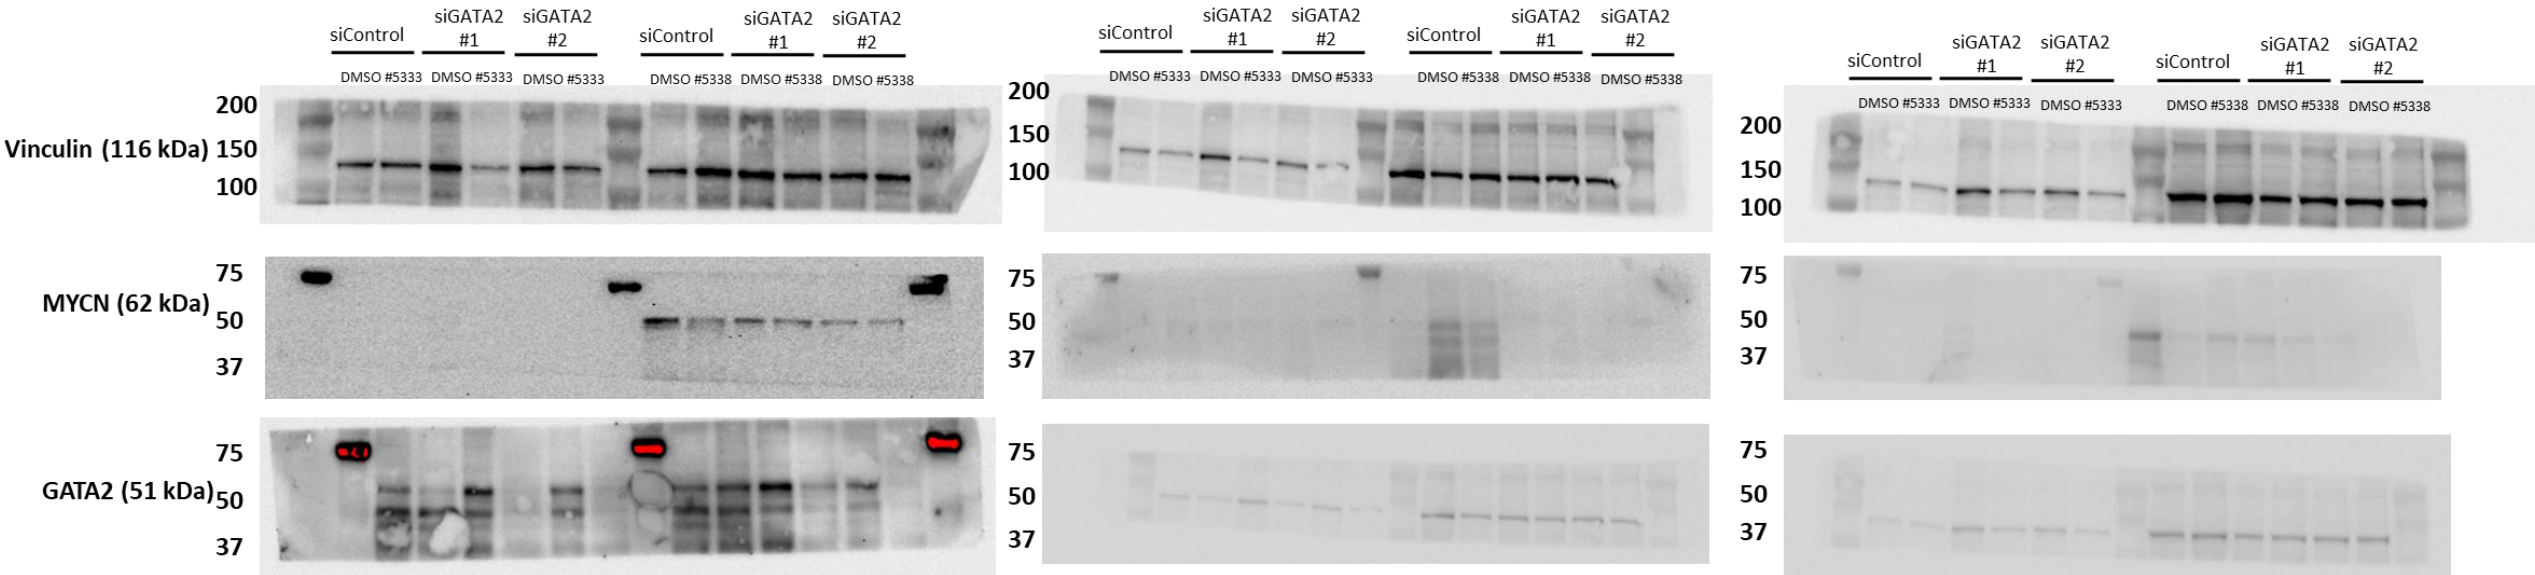

Supplement: s1 [file s1]
